# Supplementary material for: In vivo evidence for the contribution of peripheral circulating inflammatory exosomes to neuroinflammation
Source: Springer Nature journal article supplement (doi:10.1186/s12974-017-1038-8), 2018-01-08

Supplementary Figure 1.

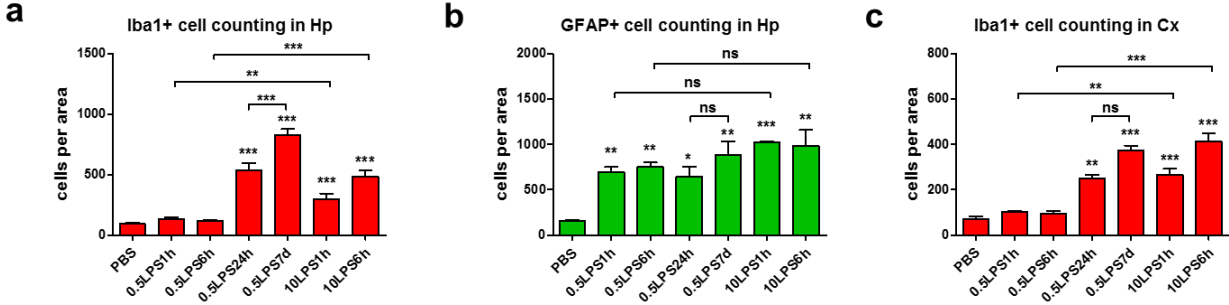

Supplement: MOESM1 [file 15350048]
